# Supplementary material for: Vesivirus 2117 capsids more closely resemble sapovirus and lagovirus particles than other known vesivirus structures
Source: PubMed Central journal article supplement (PMC5370393; doi:10.1099/jgv.0.000658), 2017-03-17

## Supplementary Figures

**Figure S1: Fourier Shell Correlation plots** for the three dimensional reconstructions of vesivirus 2117 (A), a chimeric sapovirus (B) and feline calicivirus (C).

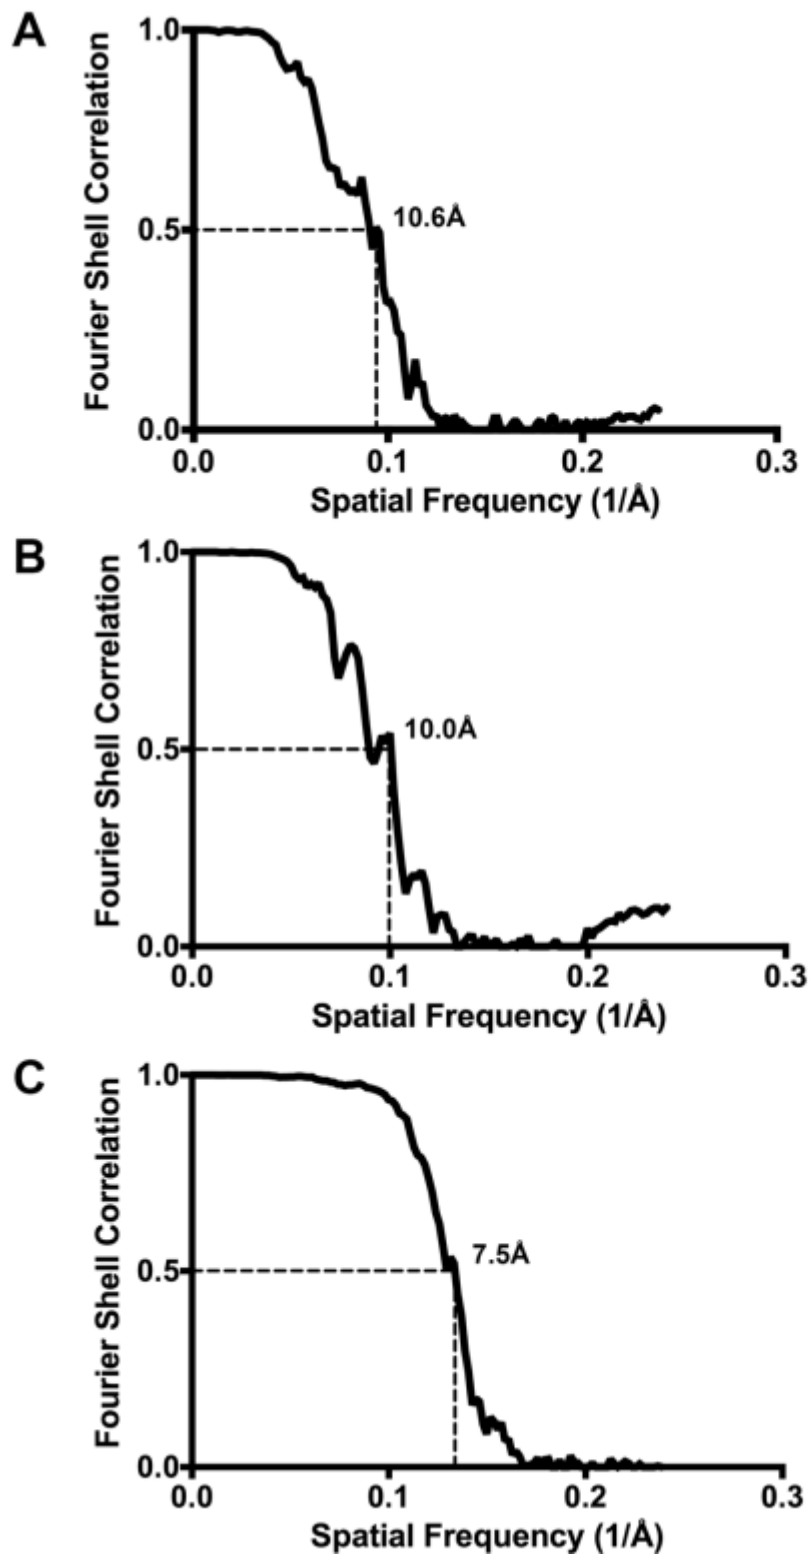

Supplement: jgv-98-68-s001.pdf [file jgv-98-68-s001.pdf]
